1 Absence of the Z-disc protein  $\alpha$ -actinin-3 impairs the mechanical stability of *Actn3KO* mouse  
2 fast-twitch muscle fibres without altering their contractile properties or twitch kinetics

3

4 Michael Haug<sup>1</sup>, Barbara Reischl<sup>1</sup>, Stefanie Nübler<sup>1</sup>, Leonit Kiriaev<sup>2,3</sup>, Davi A.G. Mázala<sup>4</sup>,  
5 Peter J. Houweling<sup>5,6</sup>, Kathryn N. North<sup>5,6</sup>, Oliver Friedrich<sup>1,2,3†</sup> & Stewart I. Head<sup>2,3,5†\*</sup>

6

7 <sup>1</sup>Institute of Medical Biotechnology, Friedrich-Alexander-University Erlangen-Nürnberg,  
8 Erlangen, Germany

9 <sup>2</sup>School of Medicine, Western Sydney University, Sydney, NSW, Australia;

10 <sup>3</sup>School of Medical Science, University of New South Wales, Sydney, NSW, Australia;

11 <sup>4</sup>Department of Kinesiology, College of Health Professions, Towson University, Towson,  
12 MD, USA;

13 <sup>5</sup>Murdoch Children's Research Institute, Melbourne, Victoria, Australia;

14 <sup>6</sup>Department of Paediatrics, University of Melbourne, Melbourne, Victoria, Australia;

15

16 †Equal authorship

17 Corresponding Author: Stewart I. Head,

18 School of Medicine, Western Sydney University, NSW Australia

19 30, Western Sydney University, Narellan Road and Gilchrist Drive, Campbelltown NSW

20 2560 Australia

21

22 **Key words:**  $\alpha$ -actinin-3, exercise, sarcoplasmic reticulum, skeletal muscle, skinned fibre,  
23 biomechatronics, biosensors, single fibre, myrobotics

24 **ABSTRACT**

25 **Background:** A common polymorphism (R577X) in the *ACTN3* gene results in complete  
26 absence of the Z-disc protein  $\alpha$ -actinin-3 from fast-twitch muscle fibres in ~16% of the  
27 world's population. This single gene polymorphism has been subject to strong positive  
28 selection pressure during recent human evolution. Previously, using an *Actn3KO* mouse  
29 model, we have shown in fast-twitch muscles, eccentric contractions at  $L_0 + 20\%$  stretch did  
30 not cause eccentric damage. In contrast,  $L_0 + 30\%$  stretch produced a significant ~40% deficit  
31 in maximum force; here we use isolated single fast-twitch skeletal muscle fibres from the  
32 *Actn3KO* mouse to investigate the mechanism underlying this.

33 **Methods:** Single fast-twitch fibres are separated from the intact muscle by a collagenase  
34 digest procedure. We use label-free *second harmonic generation* (SHG) imaging, ultra-fast  
35 video microscopy and skinned fibre measurements from our *MyoRobot* automated  
36 biomechatronics system to study the morphology, visco-elasticity, force production and  
37 mechanical strength of single fibres from the *Actn3KO* mouse. Data are presented as means  $\pm$   
38 SD and tested for significance using ANOVA.

39 **Results:** We show that the absence of  $\alpha$ -actinin-3 does not affect the unloaded maximum  
40 speed of contraction, visco-elastic properties or myofibrillar force production. Eccentric  
41 contractions demonstrated that chemically skinned *Actn3KO* fibres are mechanically weaker  
42 being prone to breakage when eccentrically contracted. Furthermore, SHG images reveal  
43 disruptions in the myofibrillar alignment of *Actn3KO* fast-twitch fibres with an increase in Y-  
44 shaped myofibrillar lattice shifts.

45 **Conclusions:** Absence of  $\alpha$ -actinin-3 from the Z-disc in fast-twitch fibres disrupts the  
46 organisation of the myofibrillar proteins, leading to structural weakness. This provides a  
47 mechanistic explanation for our earlier findings that, *in vitro* intact *Actn3KO* fast-twitch  
48 muscles are significantly damaged by L<sub>0</sub>+ 30%, but not, L<sub>0</sub>+ 20%, eccentric contraction  
49 strains. Our study also provides a possible mechanistic explanation as to why  $\alpha$ -actinin-3  
50 deficient humans have been reported to have a faster decline in muscle function with  
51 increasing age, that is; as sarcopenia reduces muscle mass and force output, the eccentric  
52 stress on the remaining functional  $\alpha$ -actinin-3 deficient fibres will be increased, resulting in  
53 fibres breakages.

#### 54 **Background**

55 Around 16% of humans lack  $\alpha$ -actinin-3, due to a homozygosity for a common  
56 polymorphism in the *ACTN3* gene. This single gene polymorphism has been subject to strong  
57 positive selection during the last 50,000-60,000 years corresponding to the migration of  
58 modern humans from the African continent (1, 2). Intriguingly, two recent publications  
59 suggest that a major positive selection pressure may have been the fact that the  $\alpha$ -actinin-3  
60 polymorphism improves an individual's cold acclimatization (3, 4). The *ACTN3* gene has  
61 become known colloquially as the "gene for speed" (1, 5).  $\alpha$ -Actinin-3 deficiency is not  
62 associated with any skeletal muscle pathology, indeed it appears to be beneficial for female  
63 elite endurance athletes (6), however, it should be noted several subsequent studies in humans  
64 (which may be underpowered due to the large genetic variability) have not supported this first  
65 report (7). The speed of shortening of a muscle fibre depends largely on the myosin heavy  
66 chain (MyHC) isoform present (8). In previous studies we have shown that MyHC expression  
67 is unaltered in *Actn3 knockout (KO)* fibres (9) and by using a skinned fibre preparation,  
68 demonstrated that there is no difference between *Actn3KO* and wild type (WT) fast-twitch  
69 fibres regarding the Ca<sup>2+</sup> sensitivity of the contractile proteins (10). In an intact preparation,

70 using a high-speed imaging technique (8) and enzymatically isolated single fibres from  
71 *Actn3KO* and WT mice, we showed no difference in maximum speed of unloaded shortening  
72 during a single action potential triggered twitch (3). Taken as a whole, these data suggest the  
73 *ACTN3KO* gene does not alter the myosin isoform or contractile functioning of the  
74 contractile proteins.

75 The  $\alpha$ -actinins are rod-shaped proteins of 35nm length that form antiparallel homodimers.  
76 Mammalian skeletal muscle expresses  $\alpha$ -actinin-2 and -3. These isoforms are the major  
77 component of the Z-disc.  $\alpha$ -Actinin-2 comprises the Z-discs of slow-twitch muscles while  $\alpha$ -  
78 actinin-3 is found exclusively in the Z-discs of fast-twitch muscles (11). The Z-discs play a  
79 key role in longitudinal force transmission from the sarcomeres to the tendons (5). In human  
80 fast-twitch muscles,  $\alpha$ -actinin-3 is more abundant in type 2X fibres compared to type 2A  
81 (12). Fast-twitch fibres are particularly susceptible to damage from eccentric contractions  
82 while slow-twitch fibres are very resistant to any damage from eccentric contractions (13,  
83 14). While it is not clear why fast-twitch fibres are more susceptible to damage due to  
84 eccentric contractions compared to slow-twitch fibres, one structural reason comes from the  
85 observations that fast-twitch fibres have narrower Z-discs which would provide less  
86 mechanical support, i.e. higher mechanical stress, during high tension contractions (11). The  
87 width of the Z-disc largely reflects the amounts of  $\alpha$ -actinin proteins anchoring the actin  
88 filaments of adjacent sarcomeres at the Z-discs. In *ACTN3KO* muscles of XX individuals  
89 there is a complete absence of  $\alpha$ -actinin-3 which is functionally compensated for by the  
90 closely related protein  $\alpha$ -actinin-2 (1). If  $\alpha$ -actinin-2 configures in the narrow Z-disc fast-  
91 twitch profile in XX individuals, then these Z-discs may be less stable than the "wild-type"  
92 narrow  $\alpha$ -actinin-3 fast-twitch Z-discs present in RR individuals homozygous for the *ACTN3*  
93 gene. In our earlier studies (15, 16) on isolated intact fast-twitch extensor digitorum longus  
94 (EDL) muscles from our mouse *Actn3KO* models, we compared the effect of eccentric

95 contractions at L<sub>0</sub>+20% and L<sub>0</sub>+30% stretch. Eccentric contractions at L<sub>0</sub>+20% stretch did not  
96 result in a significant eccentric damage force deficit, in contrast L<sub>0</sub>+30% stretch did produce  
97 a significant ~40% force deficit. We interpreted these results as suggestive that an absence of  
98  $\alpha$ -actinin-3 increases the susceptibility to damage when *Actn3KO* mouse fast-twitch muscles  
99 are subject to high forces. However, in intact muscles, there is an interference from  
100 intermuscular pathways of lateral force transmission via the dystrophin and desmin pathways  
101 as well as the mechanical role played by the connective tissue lattice supporting muscle fibres  
102 within the intact muscle. In the current study, we used single fibres to directly probe the  
103 effects of the absence of  $\alpha$ -actinin-3 on the longitudinal mechanical strength and contractility  
104 of fast-twitch fibres.

105

## 106 **Methods**

### 107 **Animals**

108 The *Actn3KO* mouse line was previously created in this laboratory (17), and experiments  
109 were performed on male animals at 12-15 months of age. A total of 6KO and 6WT mice were  
110 used in the present study. Use of animals was approved by the Animal Care and Ethics  
111 Committees of the Children's Medical Research Institute and the University of New South  
112 Wales.

113

### 114 **Skeletal Muscle single fibre enzymatic isolation**

115 Flexor digitorum brevis (FDB) and extensor digitorum longus (EDL) muscles were digested  
116 in Krebs solution composed of (in mM): 4.75 KCl, 118 NaCl, 1.18 KH<sub>2</sub>PO<sub>4</sub>, 1.18 MgSO<sub>4</sub>,  
117 24.8 NaHCO<sub>3</sub>, 2.5 CaCl<sub>2</sub> and 10 glucose containing 3 mg/ml collagenase type IV A (Sigma  
118 Aldrich, USA), gently bubbled with carbogen (95% O<sub>2</sub>, 5% CO<sub>2</sub>) and maintained at 37°C.

119 After 25-30 minutes muscles were removed from the digest solution with a wide bore glass  
120 pipette and serially rinsed twice in Krebs solution containing 0.1% foetal calf serum. Single  
121 fibres were dispersed by gentle trituration. The FDB fibres were maintained in Krebs solution  
122 with 0.1% foetal calf solution at room temperature 21-23°C and continuously bubbled with  
123 carbogen. Using a pipette, 0.5 ml of solution was drawn and placed on a cleaned glass slide  
124 on an inverted microscope, each 0.5 ml contained between 10-50 fibres. FDB fibres attached  
125 firmly to the glass cover slip and were continually superfused with Krebs bubbled with  
126 carbogen at a rate of around 0.5 ml per minute. The FDB fibres were visualized at 200x  
127 magnification on a Nikon Eclipse Ti2-E Inverted Research Microscope. For fibre length and  
128 diameter measurements (Supplementary figure A), a grid was placed in the eye piece of the  
129 microscope so that it occupied ~50% of the field of view and all fibres in this view were  
130 recorded and processed using ImageJ open-source software, the microscope was calibrated  
131 using a stage micrometre, and a total of 200 WT FDB fibres were measured. Post-digest EDL  
132 muscles were rinsed first in Krebs with 0.1% foetal calf serum to stop the collagenase  
133 reaction and then rinsed for a second time in Krebs with no foetal calf serum and no added  
134 calcium before being placed in a relaxing solution with the following composition (mM):  
135 117 K<sup>+</sup>, 36 Na<sup>+</sup>, 1 Mg<sup>2+</sup>, 60 HEPES, 8 ATP, 50 EGTA (Note: as the fibres are effectively  
136 chemically skinned by the high EGTA concentration, this is an intracellular solution).  
137 Transfers between solutions were made by sucking the digested muscle mass into a wide  
138 bored pipette. Finally, the muscle was gently agitated using a wide bore pipette to release  
139 individual fibres from the muscle. Fibres were maintained in the relaxing solution at four  
140 degrees centigrade for up to four hours before use.

141

142 **High-speed acquisition of transillumination images**

143 We selected FDB fibres with a width of 35 micrometres or greater (supplementary figure A),  
144 FDB is a fast-twitch muscle and we only used fibres which responded briskly and repeatedly  
145 to a 1msec activating pulse, over 90% of FDB fibres are fast-twitch, however, we  
146 occasionally came across fibres which were slower to contract and relax (visual inspection),  
147 these fibres were not used (18). Intact single FDB fibres were electrically field-stimulated  
148 with supramaximal voltage pulses of 1 ms duration, 10 V amplitude over a range of  
149 frequencies from 10 Hz to 100 Hz. The stimulator probe was bipolar, with two fine platinum  
150 wires isolated up to the ends, the wires were attached to a fine Perspex rod mounted on a  
151 micromanipulator to enable it to be placed close ( $\sim 10\mu\text{m}$ ) to the neuromuscular junction of  
152 the selected FDB fibre. A CMOS PCO1200hs high-speed camera (PCO AG, Kehlheim,  
153 Germany) was mounted to the camera side-port of the Nikon inverted microscope. The  
154 Peltier-cooled camera was connected to a computer for acquisition control and data storage.  
155 Single fibres approximately covered a  $520\times 160$  pixel area when visualised through a 20x  
156 objective which allowed frame rates for shortening sequences of 4,200 frames per second.  
157 Recordings were synchronised with the induction of a single twitch and image read-out and  
158 storage from the ring-buffer of the camera was performed offline. For offline analysis of each  
159 experiment, an image sequence of approximately 1,000 to 1,700 frames per fibre were  
160 analysed using a modification of a previously written processing algorithm in interactive data  
161 language environment (8).

162

### 163 **EDL skinned fibre solutions**

164 A single large (top 30% diameter of the fibres) intact EDL fibre was selected from the  
165 population of fibres using a fine bore pipette. We have previously shown that in mice there is  
166 a strong correlation between fibre size and type with fast fibres having nearly twice the cross-

187 sectional area (CSA) compared to slow-twitch type 1 (9). The selected fibre was tied onto a  
188 sensitive force transducer of the *MyoRobot* biomechanics system (19). After tying, it was  
189 placed for 10 min in solution A (see later) with 2% Triton X-100 added to chemically skin all  
190 remaining membranous cell elements. The fibre was then exposed to a series of solutions of  
191 different free  $\text{Ca}^{2+}$  concentrations. The strongly buffered  $\text{Ca}^{2+}$  solutions were prepared by  
192 mixing specific proportions of EGTA-containing solution (solution A) and Ca-EGTA-  
193 containing solution (solution B). Solution A contained 117 mM  $\text{K}^+$ , 36 mM  $\text{Na}^+$ , 8 mM  
194 adenosine triphosphate (ATP, total), 1 mM free  $\text{Mg}^{2+}$ , 10 mM creatine phosphate, 50 mM  
195 EGTA (total), 60 mM N-[2- hydroxyethyl] piperazine-N'-[2-ethanesulfonic acid] (HEPES),  
196 and 1 mM  $\text{NaN}_3$  (pH 7.10). Solution B was similar to solution A, with the exception that the  
197 EGTA and  $\text{Ca}^{2+}$ -EGTA concentrations of solution B were 0.3 and 49.7 mM, respectively.  
198 The free  $\text{Ca}^{2+}$  concentrations of the solutions were calculated using a  $K_{\text{apparent}}$  for EGTA of  
199  $4.78 \times 10^6 \text{ M}^{-1}$  (20). Maximal force was determined by exposure to solution B, containing a  
200 free  $\text{Ca}^{2+}$  concentration of  $3.5 \times 10^{-5} \text{ M}$ . Force was returned to baseline after maximal  
201 activation by exposure to solution A. The plateaus of the force responses elicited by exposure  
202 to solutions of increasing free  $\text{Ca}^{2+}$  concentration are expressed as a percentage of maximum  
203  $\text{Ca}^{2+}$ -activated force and plotted as a function of pCa. The force-pCa data were fitted with  
204 Hill curves using GraphPad Prism8.

185

### 186 **The MyoRobot, automated biomechanics system**

187 For full details of the *MyoRobot* see Haug (19). The following procedures were carried out on  
188 the EDL fibres using the *MyoRobot*. Force-pCa: the fibre was immersed in wells containing  
189 highly-EGTA buffered internal solutions with decreasing pCa values, made up by mixing  
190 solutions A&B (see above). Exposure to each pCa was for 20 seconds.



191 Slack test; speed of shortening: The slack test assumes a constant shortening velocity of  
192 muscle fibres upon imposing a sudden small slack to the fibre when isometrically activated.  
193 Fibres were held at resting length  $L_0$ , transferred to a maximally activating  $Ca^{2+}$  solution and  
194 maintained in this solution until the force produced by the fibre reached a steady-state  
195 plateau. The voice coil actuator (with fibre attached) was then linearly moved at maximum  
196 speed (250 mm/s) towards the transducer pin (other end of fibre attached) for a given slack  
197 length (5–40%  $L_0$ ). While force declined to zero, the force was continuously monitored at 2  
198 kHz high sampling rate until force redeveloped through ongoing fibre shortening, re-  
199 establishing isometric force production. When the next steady-state force level was reached,  
200 the preparation was dipped in high EGTA relaxing solution where the voice coil pin was  
201 returned to  $L_0$  under relaxing conditions before the next slack test was imposed.

202 Passive axial elasticity, resting length-tension curves: To assess axial fibre compliance  
203 through resting length-tension curves when the fibre was relaxed in low  $Ca^{2+}$  the voice coil  
204 was driven at very slow speed (quasi-static) to stretch the fibre while passive restoration force  
205 was sampled at 200 Hz. Since the skinned fibres possess viscous properties (e.g., presence of  
206 titin), the stretch velocity was optimized to values slow enough to be in a steady-state  
207 between instantaneous elastic restoration force and viscous relaxation.

208 Eccentric contractions: The fibre was placed in a maximal  $Ca^{2+}$  activating solution and  
209 allowed to produce maximal isometric force; it was then stretched by 20% of  $L_0$  for two  
210 seconds, the stretch was released for a further two seconds before the fibre was relaxed in a  
211 low  $Ca^{2+}$ , high EGTA solution. The procedure was carried out three times in total, and a final  
212 maximal  $Ca^{2+}$ -activating force recorded.

213 Second harmonic generation imaging of single fibres: Single EDL fibres were tied to thin  
214 glass rods and fixed in 0.1% glutaraldehyde solution for SHG microscopy. Glass rods with

215 one EDL fibre each were mounted into a microscopy chamber immobilized between  
216 Vaseline® stripes for multiphoton imaging, for details see Friedrich (21).

217

## 218 **Statistics**

219 Data were presented as means  $\pm$  SD. Differences occurring between genotypes were assessed  
220 by one-way ANOVA with respect to genotype. Post hoc analysis was performed using Holm-  
221 Sidak's multiple comparisons test. The Logrank test was used to compare survival  
222 distributions of muscle fibres during contraction and the Mann Whitney test used for  
223 comparing angular variability of myofibres between groups. All tests were conducted at a  
224 significance level of 5%. All statistical tests and curve fitting were performed using a  
225 statistical software package Prism Version 8 (GraphPad, USA).

226

## 227 **Results**

228 FDB muscles were dispersed into intact single fibres by collagenase digestion. A typical  
229 digest normally yields over 200 viable fibres. Supplementary figure A shows the range of  
230 muscle fibre widths obtained from a digest from a control FDB muscle. Since we first  
231 described using Bekoff and Betz (22) digest technique on mouse fibres in 1990 (23) it has  
232 proved a robust tool to generate intact isolated mouse muscle fibres for the study of their cell  
233 physiology (24, 25). A viewing of the video from our high-speed camera of a single unloaded  
234 FDB fibre contracting at 20 Hz shows the reliability of this preparation in being able to  
235 produce repetitive unloaded contraction and relaxation cycles (Supplementary Figure B  
236 (video)). Figure 1A, B shows single FDB fibres from *Actn3KO* and WT being stimulated at  
237 10-100 Hz and their associated fibre length and shortening velocity. The combined data is  
238 shown in Figure 1C, D. The shortening length and maximum velocity of shortening were not

239 significantly different between *Actn3KO* and WT, however, at higher frequencies of  
240 stimulation (20-100Hz) there was a significant slowing of the minimum relative shortening  
241 length, which was similar for both genotypes Figure 1C. At 30 Hz the absolute maximum  
242 velocity was significantly faster in *Actn3KO*, this difference was no longer present at 100Hz,  
243 Figure 1D. The values we measured for velocity of shortening were similar to those  
244 previously reported for mouse fast-twitch fibres (8). For the skinned fibre experiments, we  
245 used the EDL fast-twitch muscle with longer fibres suitable for tying to a sensitive force  
246 transducer (not feasible for the ~500  $\mu$ m long FDB fibres). The mouse EDL has been shown  
247 to have a fibre type distribution that is ~79% type 2B (fast glycolytic), ~16% type 2X and  
248 ~4% type 2A (fast oxidative glycolytic) muscle fibres (26).

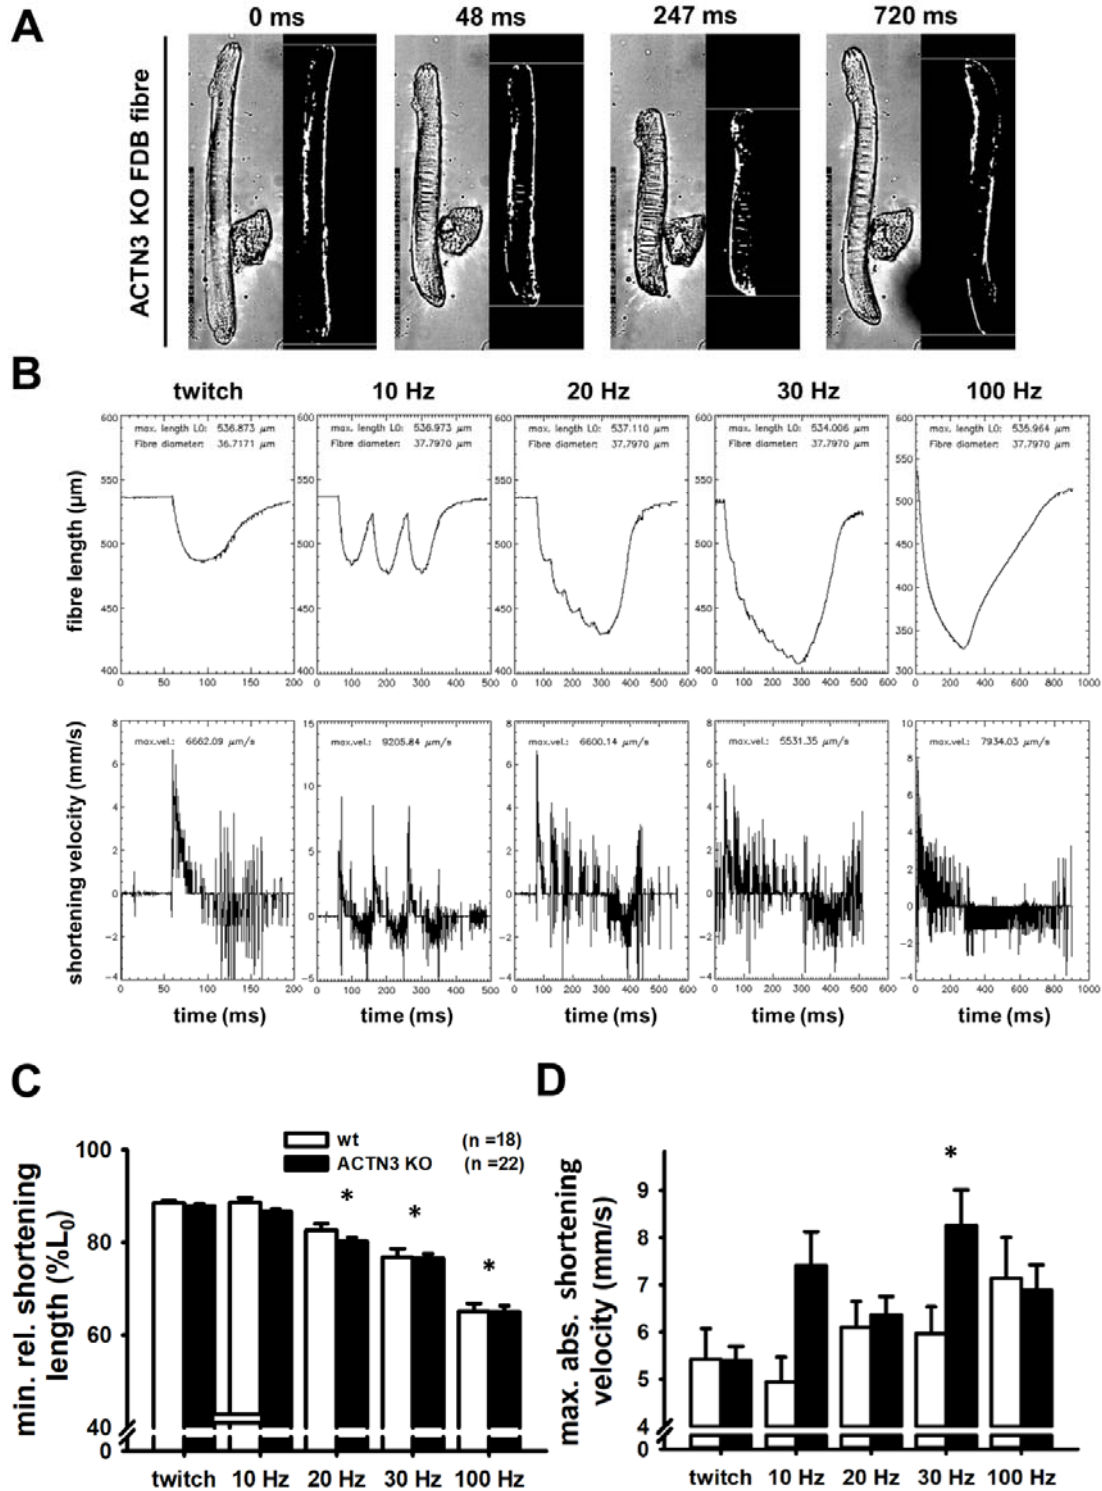

249

250 **Figure 1: Unloaded speed of shortening of single dissociated intact FDB fibres from WT**  
 251 **and *Actn3KO* mice. (A), Example images recorded with a high-speed camera during a**  
 252 **shortening sequence of a *Actn3KO* single fibre stimulated at 100Hz and recorded at 4,166 fps**

253 at indicated time stamps. Also shown are the automated analysis images from which the  
254 shortening parameters, fibre length and shortening velocity were obtained. **(B)**, Analysed  
255 time traces of these parameters for the same fibre at indicated stimulation frequencies. **(C)**  
256 Minimum shortening length was not different between genotypes, however, there was a  
257 significant overall reduction 20-100Hz as indicated \*. **(D)** Absolute maximum shortening  
258 velocities were not different between genotypes apart from 30 Hz where *Actn3KO* were  
259 significantly faster as indicated by \*. Data are from four animals each. Significance WT vs.  
260 KO based on one-way ANOVA test indicated as follows: \*  $p < 0.05$

261

262 Figure 2 shows the maximal force produced by isolated myofibres from *Actn3KO* and WT  
263 mouse EDL. Figure 2A shows that that *Actn3KO* fibres tended to produce less absolute force  
264 than WT, but when corrected for CSA (specific force) the maximal force output of the  
265 myofibrillar proteins was the same for both genotypes, confirming our results from the intact  
266 whole EDL (15). Figure 2B shows the fibre diameter distributions of WT and *Actn3KO*; here  
267 we see a trend for the fibres to be of smaller diameter in *Actn3KO* as we have previously  
268 reported (9), however, here these are not random samples, as for both WT and *Actn3KO*, we  
269 actively selected the longest fibres with the largest diameters for attaching to the force  
270 transducer. Figure 2C shows the combined pCa-force curves generated for the WT and  
271 *Actn3KO* fibres; there were no meaningful differences in the contractile properties, i.e. the  
272 slope of the pCa-force curves or  $pCa_{50}$  and these parameters were in the range of those  
273 previously reported for fast-twitch fibres (27).

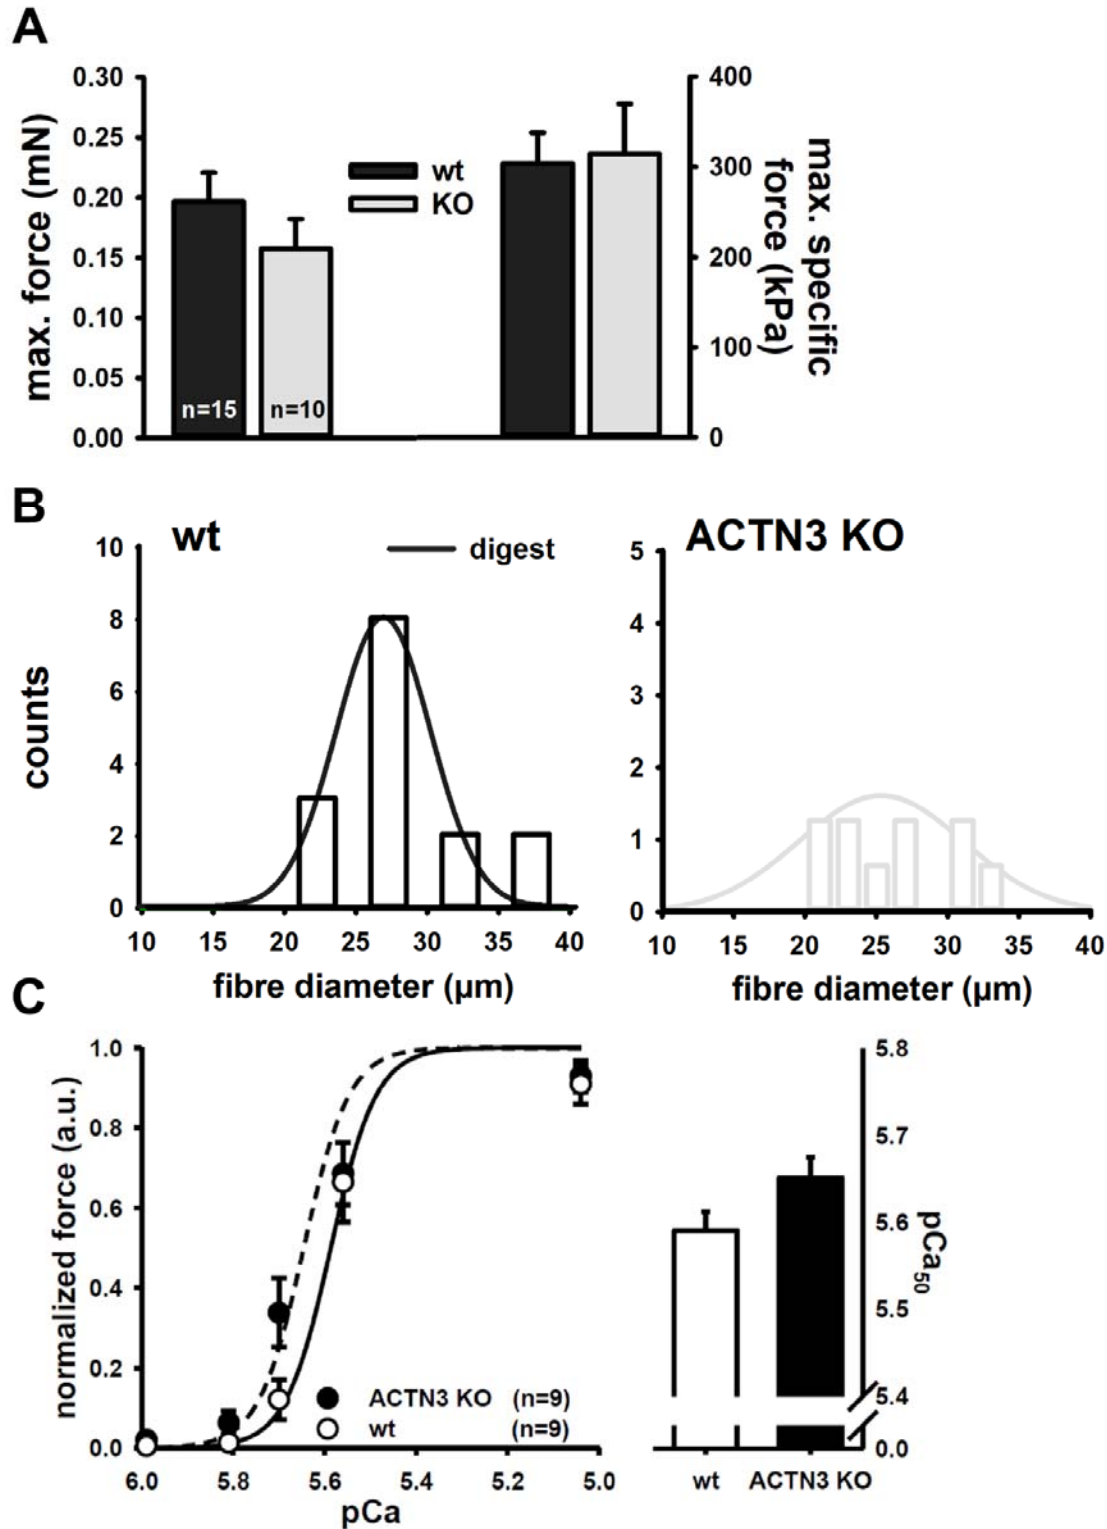

274

275 **Figure 2: Maximum myofibrillar force in single EDL fibres from *Actn3KO* mice is**

276 **unaltered compared to WT. (A), Statistical analysis of maximum force and specific force**

277 (normalized to fibre diameter-derived CSA) values from EDL muscles of WT and *Actn3KO*  
278 mice. No significant differences based on one way ANOVA tests were apparent. (B),  
279 Analysis of fibre diameter distributions shows a trend to smaller diameter in the *Actn3KO*  
280 fibres. (C), Calcium-sensitivity shown as pCa-force relationship. Average data are displayed  
281 along with the reconstructed average fit, which suggest a shift towards a decreased  $\text{Ca}^{2+}$ -  
282 sensitivity in *Actn3KO* fibres.

283

284 In Figure 3, we show the results for unloaded velocity of shortening (19) where a fibre is first  
285 activated in the maximally activating pCa solution and then subject to a series of rapid  
286 releases of tension at release 'slack' lengths 10-40% of  $L_0$ , the rate of tension redevelopment  
287 is measured for each 'slack'. We focused on the fast-phase of tension redevelopment which is  
288 related to the myosin crossbridge kinetics. Figure 3A shows the raw data run from a WT EDL  
289 fibre, the dotted line labelled  $F_{\text{sig}}$  delimits the end of the fast phase of force redevelopment  
290 resulting from the cycling of the myosin heads. In Figure 3B, we report the rate of change of  
291 length during the fast phase, the slope of the lines gives us the parameter  $V_{\text{fast}}$  (fast velocity)  
292 which is shown as a bar graph in Figure 3C demonstrating that the *Actn3KO* genotype does  
293 not alter the fast phase of the velocity of shortening.

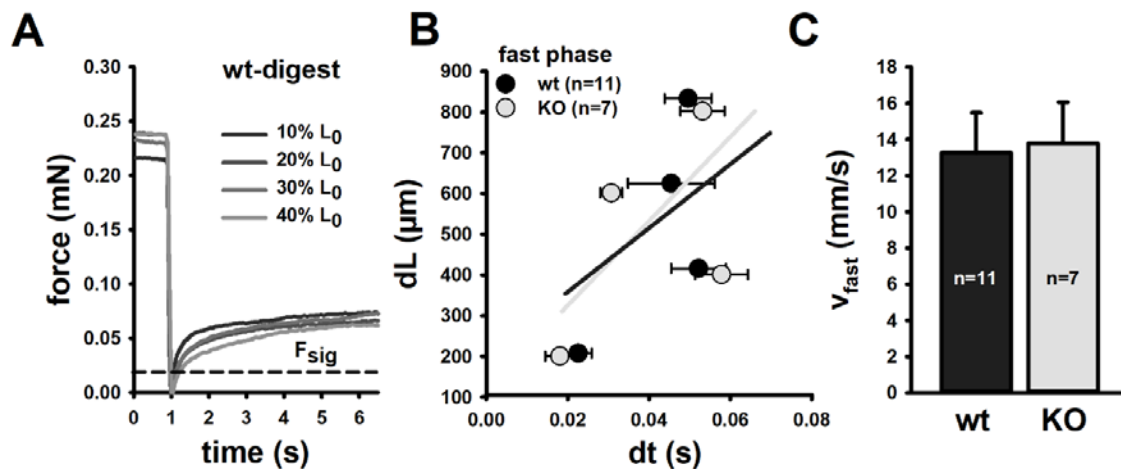

294

295 **Figure 3: Unloaded shortening of single EDL fibres following myofibrillar activation is**  
296 **unaltered in *Actn3KO* but internally loaded shortening is slowed in digested single**  
297 ***Actn3KO* fibres. (A), Representative example recording of a single muscle fibre during the**  
298 **slack-test using the *MyoRobot* to sequentially apply a series of slacks between 10% and 40%**  
299 **of resting length  $L_0$ . (B), dL-dt relationships of 7 and 11 single fibres from WT and *Actn3KO***  
300 **mice reveals similar shortening kinetics in both. (C), Statistical analysis based on a one-way**  
301 **ANOVA of  $V_{fast}$  values supports the findings of similar shortening kinetics for the entire data**  
302 **set.**

303

304 We further demonstrate that resting length-tension curves and steady-state compliance are not  
305 different between *Actn3KO* and WT myofibres, showing that the absence of  $\alpha$ -actinin-3 from  
306 the Z-discs did not alter the elastic properties of the myofibrils (Figure 4C.).

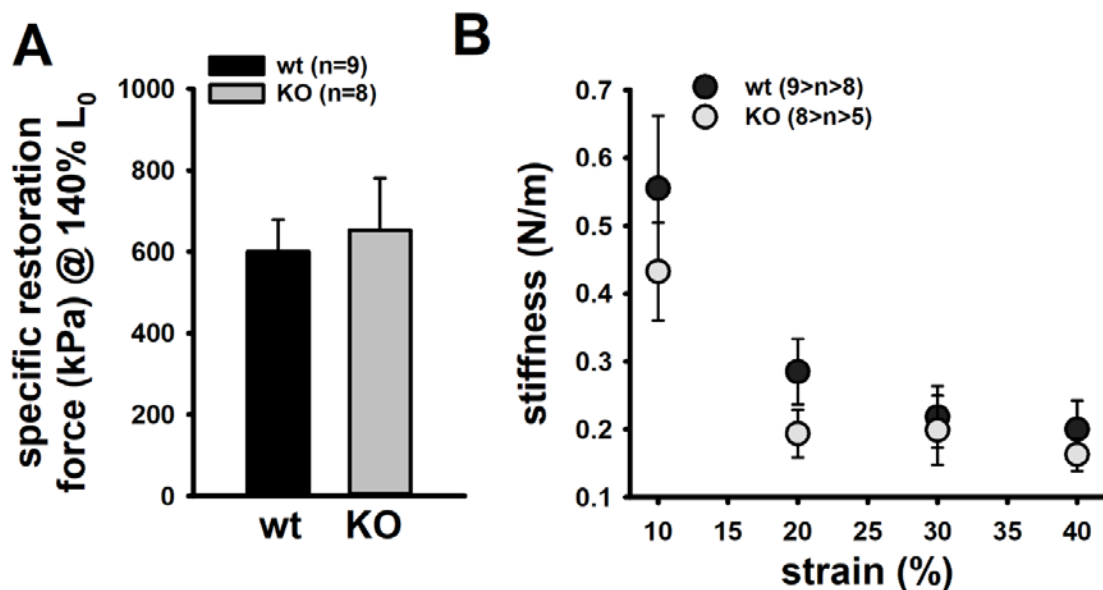

307

308 **Figure 4: Resting length-tension curves and steady-state compliance of EDL *Actn3KO***  
309 **single fibres. (A), Specific restoration force (stress) at 140%  $L_0$  analysed in a number of WT**



310 and *Actn3KO* fibres. **(B)**, Steady-state stiffness values vs. strain indicate somewhat lower  
311 mechanical stiffness in the *Actn3KO* background compared to the WT.

312

313 We next looked at the single fibre visco-elasticity in *Actn3KO* and WT by rapidly stretching  
314 the single fibre in a series of 10% steps up to 60% longer than its starting value of  $L_0$  (100%)  
315 (Figure 5). Here, a peak restoration tension was rapidly reached with each step followed by  
316 an exponential force relaxation as shown in Figure 5A. Three parameters; absolute specific  
317 restoration force, absolute specific relaxation force and the rate of relaxation are shown on  
318 the raw data trace in Figure 5A. Total maximal specific force produced by each stretch was  
319 not different between *Actn3KO* and WT (Figure 5B). After attaining maximum force at each  
320 length, the fibre was allowed to relax to a new steady-state over four seconds. Then, we  
321 evaluated the amount of force drop during the relaxation period, which was not significantly  
322 different between WT and *Actn3KO* (Figure 5C). Figure 5D shows the rate of relaxation, and  
323 once again, there was no difference between WT and *Actn3KO*.

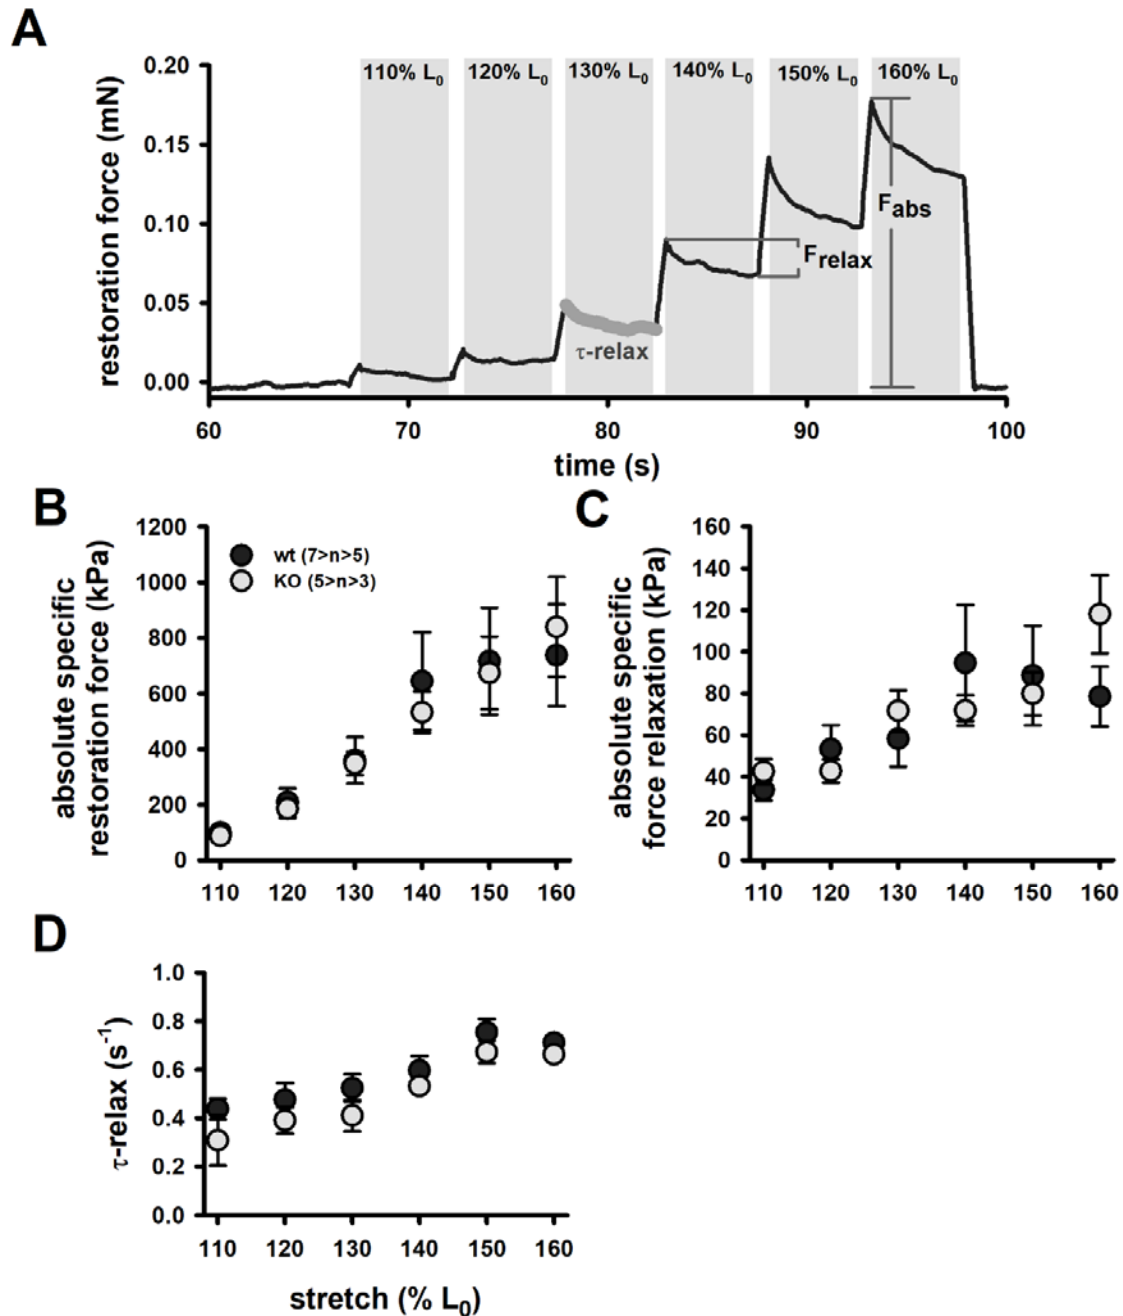

324

325 **Figure 5: Single fibre visco-elasticity in EDL muscle from adult and old *Actn3KO* mice.**

326 (A), Example trace of ‘strain-jumps’ of increasing 10%  $L_0$  amplitudes quickly applied to the  
327 fibre using the *MyoRobot* biomechanics system. Each sudden stretch is answered by an  
328 instantaneous increase in restoration force  $F_R$  to a new maximum  $F_{abs}$  (B) before

329 exponentially relaxing to achieve a new steady-state level with relaxation amplitude  $F_{\text{relax}}$  (C)  
330 and a time constant  $\tau_{\text{relax}}$  (D).

331

332 To investigate the mechanical stability of the *Actn3KO* fibres, a set of three eccentric  
333 contractions were performed at +20% of  $L_0$  (Figure 6A), the fibre was first maximally  
334 activated by exposing it to a high  $\text{Ca}^{2+}$  solution. Once the force had plateaued it was stretched  
335 by 20% of  $L_0$ , held for two seconds and then released. The fibre was then allowed to reach a  
336 new maximal plateau for two seconds before being relaxed in a high EGTA relaxing solution.  
337 Figure 6B shows that during the three contraction eccentric protocol, there was a significant  
338 number of fibres which broke apart so that the fibre separated into two distinct pieces. When  
339 we quantified these breakages, it was clear *Actn3KO* fibres broke more frequently because of  
340 the eccentric contraction protocol than WT (Figure 6B).

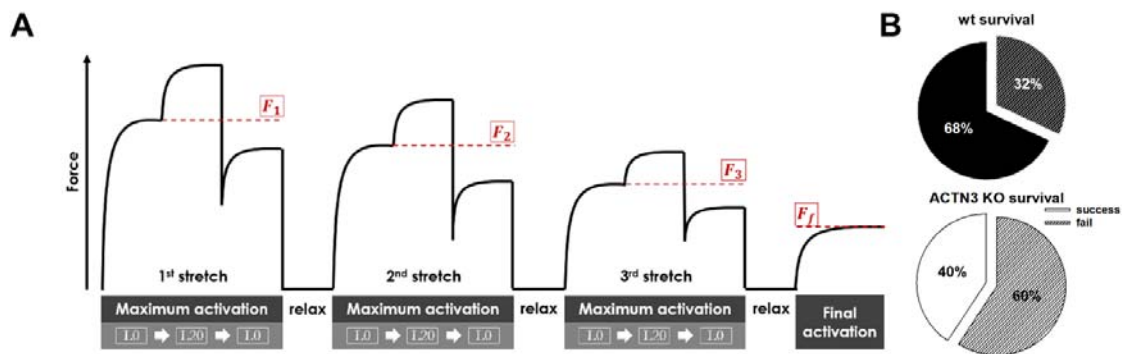

341

342 **Figure 6: Contraction induced breakages are more pronounced in EDL fibres from**  
343 *Actn3KO* mice. (A), Scheme of recurrent eccentric contractions, maximally activating a  
344 single fibre and then imposing a 20% stretch for several seconds before returning to resting  
345 length  $L_0$  and subsequent relaxation. Three such eccentric contractions were pursued  
346 followed by a final assessment of maximum isometric force. (B), *Actn3KO* fibres showed

347 much lower survival and higher rate of breakage during the sequence to a significance of  
348  $p=0.02$  based on logrank analysis.

349

350 To investigate if there was a morphological reason for the increased breakage in the *Actn3KO*  
351 fibres, we used *Second Harmonic Generation imaging* (SHG) and quantitative morphometry  
352 in single EDL muscle fibres (Figure 7). Group analysis of 54 WT fibres and 35 *Actn3KO*  
353 fibres showed that the *Actn3KO* fibres had significantly higher levels of myofibrillar axial  
354 lattice disorder, which we term vernier density (VD) likely due to Z-disc anchorage  
355 inhomogeneities resulting from the absence of  $\alpha$ -actinin-3 (Figure 7B). These myofibrillar Y  
356 shaped vernier deviations or disruptions (Figure 7A, B) will be points susceptible to  
357 mechanical weakness in the contractile filaments present in fibres (see discussion for  
358 modelling).

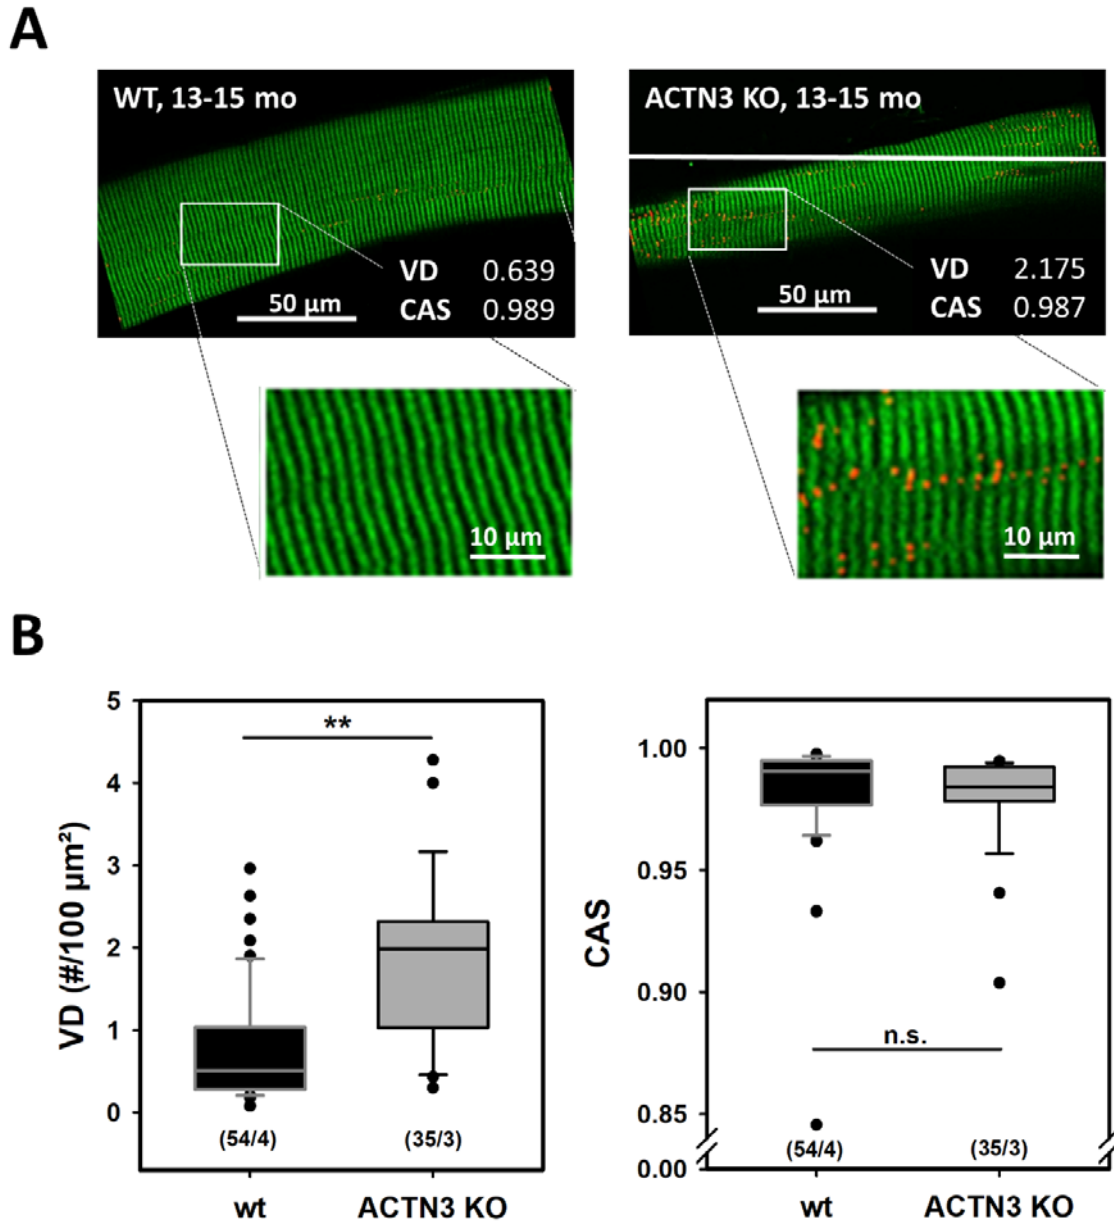

359

360 **Figure 7: SHG imaging and quantitative morphometry in single dissociated EDL fibres**  
361 **reveal misregistered myofibrillar ultrastructure in *Actn3KO*.** (A), Representative example  
362 images from the middle plane of a single WT and *Actn3KO* EDL fibre (top) of the same 13-  
363 15 month age group alongside with the automatically detected verniers (red) and the vernier  
364 density (VD) and cosine angle sum (CAS) values derived from the morphometry analysis. A  
365 magnified rectangular section is given below the images. (B), Group analysis in a substantial  
366 number of single fibres from several animals reveals significantly higher VD values in

367 *Actn3KO* fibres over fibres from WT littermates, indicative of a higher linear *out-of-register*  
368 disorder. As for the angular variability of myofibrils, the CAS values were similar in both  
369 groups. \*\*:  $p < 0.001$ , Mann-Whitney Rank sum test. (n/m): n single fibres from m animals.

370

## 371 **Discussion**

372 Force transmission from the myosin heads to the Z-disks (a major component of which is the  
373 protein of  $\alpha$ -actinin-2 and  $\alpha$ -actinin-3) is mediated by actin filaments and titin (28). The Z-  
374 discs are the focal point of force transmission and mechanical strength within the fibre (5).  
375 When muscles are damaged by excessive forces, such as those experienced during an  
376 eccentric contraction, electron micrographs show that the initial point of damage is at the Z-  
377 disc (29). Fast-twitch muscles express their own isoform of  $\alpha$ -actinin,  $\alpha$ -actinin-3. Globally,  
378 ~1.6 billion people have a polymorphism (R577X) in the *ACTN3* gene which means they  
379 cannot produce the protein  $\alpha$ -actinin-3 in their fast-twitch muscles (2); in these people,  $\alpha$ -  
380 actinin-2 is upregulated to (partially) compensate for the loss. We have generated an  
381 *Actn3KO* mouse model to study the morphological and contractile consequences of the  
382 absence of  $\alpha$ -actinin-3 from fast-twitch muscles. However, it should be born in mind that the  
383 Z-disc also has a key role as a force sensor linking tension along the myofibrils with  
384 intracellular chemical signalling mechanisms (30). Our FDB digest technique has been  
385 refined from our first digest of mouse skeletal muscle fibres in 1990 (23). In its current form  
386 the digest produces over 200 single contracting fibres per batch, the majority of which could  
387 undergo at least three consecutive rounds of fatiguing contractions followed by recovery.  
388 High magnification high speed video framing (up to 4,166 frames per second) showed that  
389 over 70% of the single FDB fibres attached to cleaned glass cover slips at their centre  
390 portions. They shortened and relaxed linearly about this point (Figure 1A&B and

391 supplementary Figure B (video)) when stimulated with a supramaximal voltage pulse 1 ms in  
392 duration delivered from a bipolar pair of platinum wires insulated to the tips and positioned  
393 close to the neuromuscular junction. A portion of the fibres would bend into crescent shapes  
394 during repeated contractions, and those were discarded from shortening analyses. A platinum  
395 electrode was used to stimulate the selected fibres from 10-100 Hz, we showed the maximum  
396 shortening velocity and minimum shortening length were basically the same in *Actn3KO*  
397 fibres and WT. This supports our earlier findings which reported the *Actn3* polymorphism  
398 and resulting absence of  $\alpha$ -actinin-3, did not alter the expression of the fast myosin isoform  
399 (9, 10, 15), however, this is the first time this has been shown directly for unloaded  
400 shortening of fibres rather than inferred from the myosin type. For the skinned fibre  
401 experiments, we used the EDL muscle to get individual fibres which were long enough to  
402 manually tie to a force transducer biomechanics system. Given ~79% of EDL fibres are of  
403 2B MHC isoform, ~16% type 2X and ~4% type 2A (26), we have previously shown (9) that  
404 2B fibres are around twice the diameter of the 2X and 2A fibres. Thus, by selecting the top  
405 30% of the largest diameter fibres, we were confident in having 2B fibres. This was  
406 confirmed by the pCa-force curves which were consistent with fast-twitch type 2B fibre types  
407 (Figure 2C). The similarity of the pCa-force curves between genotypes supports earlier  
408 findings that there are no changes in myosin isoforms (1).  $\alpha$ -Actinin proteins are a key  
409 component of the Z-discs anchoring actin fibres from adjacent sarcomeres and transmitting  
410 force longitudinally to the tendons (11, 28), thus the chemical skinned fibre technique, using  
411 whole chemically skinned fibres (as opposed to mechanically skinned fibre segments) is the  
412 ideal way to test the effect of absence of  $\alpha$ -actinin-3 from the Z-discs in fast-twitch muscle. In  
413 this preparation there is no interference from adjacent fibres, connective tissue or lateral  
414 transmission of force (28). We measured unloaded shortening, resting length tension,  
415 stiffness, and visco-elasticity using the *MyoRobot* biomechanics skinned fibre set up (19).

416 We found no significant differences in these properties indicating that both  $\alpha$ -actinin-2 and  $\alpha$ -  
417 actinin-3 confer the same mechanical properties to Z discs. In an elegant, skinned fibre study  
418 on *ACTN3KO* humans, Broos (31) showed in terms of their visco-elastic properties, fast-  
419 twitch 2X muscle fibres from  $\alpha$ -actinin-3 positive humans were the same as those from  
420 humans who were  $\alpha$ -actinin-3 negative. The group also showed that there was no difference  
421 in maximum specific force with respect to genotype, as we would predict from our earlier  
422 studies where we showed there was no change in myosin isoform expression with respect to  
423 genotype (1, 9, 10, 15). Our current studies in the mouse confirm the human findings, and  
424 while we did see a trend towards less absolute force in *Actn3KO*, this was due to the fact, as  
425 confirmed by Broos (31), that *Actn3KO* fast fibres (2X humans, 2B mice) are significantly  
426 smaller in diameter, and when we normalised the force results for cross sectional area, we  
427 found the maximal specific force was the same.

428 We have previously reported that when the isolated EDL muscles are subjected to five  
429 eccentric contractions of 20%+L<sub>0</sub> strain there is no effect of genotype on the eccentric  
430 contraction-induced force deficit (15). Intriguingly, in a later study (16) when we used a  
431 stronger eccentric contraction protocol with a strain of 30%+L<sub>0</sub>, there was a significant  
432 increase in the eccentric contraction force-deficit in the *Actn3KO* fast-twitch EDL muscles.  
433 The results from the current study provide a likely explanation for these whole muscle results  
434 as we show that in some cases fibres from both *Actn3KO* and WT EDL muscles can  
435 withstand three eccentric contractions of 20% strain, however, ~60% of the *Actn3KO* fibres  
436 broke during the procedure compared with ~35% of the WT fibres (Figure 6B). *Second*  
437 *harmonic imaging* of single EDL fibres revealed a myofibrillar structural deformity which  
438 provides a plausible explanation for this increased mechanical instability associated with the  
439 *Actn3KO* genotype. *Actn3KO* fibres contained numerous axial lattice shift of adjacent  
440 myofibrils (verniers apparent as ‘Y’-patterns) of the myofibrillar contractile proteins, like the



441 vernier deviations we have previously reported in unbranched dystrophic muscle fibres  
442 (termed "chaotic") from the *mdx* mouse (21, 32). Modelling from intact fibres (33) has shown  
443 that macroscopic splits or branches within a fibre, are points of mechanical weakness which  
444 may be susceptible to breakage when fibres were stressed by eccentric contractions. We  
445 propose that the *Actn3KO* fast fibres behave normally under moderate strains, but as the  
446 strain increases there comes a point where the weaker dislodged myofibril arrays start to  
447 snap, setting up a positive feedback loop placing additional stresses on the remaining VD  
448 which in turn break. This provides an explanation as to why the intact muscle was not  
449 damaged at 20%+L<sub>0</sub> eccentric contraction strain (15), but showed a significant force loss at  
450 30%+L<sub>0</sub> (16), which in our model would be sufficient strain to rupture the weaker  
451 myofibrillar out-of-register lattice in the fast  $\alpha$ -actinin-3 deficient fibres. We have previously  
452 shown the presence of internalized centralized nuclei at baseline in *Actn3KO* muscles.  
453 Centralized nuclei were not present in the age matched controls (16). Centralized nuclei are  
454 an accepted histological marker of a regenerated fibre. This would suggest these fast-twitch  
455 fibres with increased myofibrillar lattice shifts are subject to damage during normal muscle  
456 contraction when compared to WT fast fibres containing  $\alpha$ -actinin-3 in the Z-discs. There  
457 have been several reports in the literature that  $\alpha$ -actinin-3 deficient individuals may  
458 experience faster decline in muscle function with increasing age (9, 34) and our results may  
459 explain some of this decline because as sarcopenia develops, the loss of muscle mass will  
460 place greater stress on the remaining fast-twitch muscles during eccentric contractions. In the  
461 case of individuals lacking  $\alpha$ -actinin-3 protein, their remaining fast-twitch muscles will be at  
462 greater risk of damage compared to  $\alpha$ -actinin-3 protein positive individuals. This will be  
463 compounded by the reduced diameter of the fast-twitch muscles in the  $\alpha$ -actinin-3 protein  
464 deficient individuals, increasing mechanical axial stress on single fibres.

465

466 **Conclusion**

467 1). Unloaded single fibre shortening length and maximum speed of shortening at different  
468 field-stimulation frequencies (10-100Hz) are unaltered by the absence of  $\alpha$ -actinin-3 in  
469 *Actn3KO* single intact muscle fibres from FDB fast-twitch muscle.

470 2). Using the chemically skinned fibre technique with single fast-twitch EDL fibres, we show  
471 visco-elastic properties and myofibrillar force production (force-pCa) are not affected by the  
472 absence of  $\alpha$ -actinin-3.

473 3). When chemically skinned single EDL fibres were maximally activated and subjected to  
474 three eccentric contractions of Lo+20% strain, ~60% of the *Actn3KO* fibres broke during the  
475 procedure compared with ~35% of the WT fibres.

476 4). Second harmonic imaging of single *Actn3KO* EDL fibres revealed myofibrillar structural  
477 abnormalities with an axial lattice shift of adjacent myofibrils (verniers apparent as 'Y'-  
478 patterns).

479 5). The structural weakness caused by the Y shaped vernier branches provides a plausible  
480 explanation for the increased mechanical instability associated with the *ACTN3* genotype.

481

482 **Figure legends**

483 **Figure 1: Unloaded speed of shortening of single dissociated intact FDB fibres from WT**  
484 **and *Actn3KO* mice. (A)**, Example images recorded with a high-speed camera during a  
485 shortening sequence of a *Actn3KO* single fibre stimulated at 100Hz and recorded at 4,166 fps  
486 at indicated time stamps. Also shown are the automated analysis images from which the  
487 shortening parameters, fibre length and shortening velocity were obtained. **(B)**, Analysed  
488 time traces of these parameters for the same fibre at indicated stimulation frequencies. **(C)**

489 Minimum shortening length was not different between genotypes, however, there was a  
490 significant overall reduction 20-100Hz as indicated \*. **(D)** Absolute maximum shortening  
491 velocities were not different between genotypes apart from 30 Hz where *Actn3KO* were  
492 significantly faster as indicated by \*. Data are from four animals each. Significance WT vs.  
493 KO based on one-way ANOVA test indicated as follows: \*  $p < 0.05$

494

495 **Figure 2: Maximum myofibrillar force in single EDL fibres from *Actn3KO* mice is**  
496 **unaltered compared to WT. (A)**, Statistical analysis of maximum force and specific force  
497 (normalized to fibre diameter-derived CSA) values from EDL muscles of WT and *Actn3KO*  
498 mice. No significant differences based on one way ANOVA tests were apparent. **(B)**,  
499 Analysis of fibre diameter distributions shows a trend to smaller diameter in the *Actn3KO*  
500 fibres. **(C)**, Calcium-sensitivity shown as pCa-force relationship. Average data are displayed  
501 along with the reconstructed average fit, which suggest a shift towards a decreased  $Ca^{2+}$ -  
502 sensitivity in *Actn3KO* fibres.

503

504 **Figure 3: Unloaded shortening of single EDL fibres following myofibrillar activation is**  
505 **unaltered in *Actn3KO* but internally loaded shortening is slowed in digested single**  
506 ***Actn3KO* fibres. (A)**, Representative example recording of a single muscle fibre during the  
507 slack-test using the *MyoRobot* to sequentially apply a series of slacks between 10% and 40%  
508 of resting length  $L_0$ . **(B)**,  $dL-dt$  relationships of 7 and 11 single fibres from WT and *Actn3KO*  
509 mice reveals similar shortening kinetics in both. **(C)**, Statistical analysis based on a one-way  
510 ANOVA of  $V_{fast}$  values supports the findings of similar shortening kinetics for the entire data  
511 set.

512

513 **Figure 4: Resting length-tension curves and steady-state compliance of EDL *Actn3KO***  
514 **single fibres.** (A), Specific restoration force (stress) at 140%  $L_0$  analysed in a number of WT  
515 and *Actn3KO* fibres. (B), Steady-state stiffness values vs. strain indicate somewhat lower  
516 mechanical stiffness in the *Actn3KO* background compared to the WT.

517

518 **Figure 5: Single fibre visco-elasticity in EDL muscle from adult and old *Actn3KO* mice.**  
519 (A), Example trace of ‘strain-jumps’ of increasing 10%  $L_0$  amplitudes quickly applied to the  
520 fibre using the *MyoRobot* biomechatronics system. Each sudden stretch is answered by an  
521 instantaneous increase in restoration force  $F_R$  to a new maximum  $F_{abs}$  (B) before  
522 exponentially relaxing to achieve a new steady-state level with relaxation amplitude  $F_{relax}$  (C)  
523 and a time constant  $\tau_{relax}$  (D).

524

525 **Figure 6: Contraction induced breakages are more pronounced in EDL fibres from**  
526 ***Actn3KO* mice.** (A), Scheme of recurrent eccentric contractions, maximally activating a  
527 single fibre and then imposing a 20% stretch for several seconds before returning to resting  
528 length  $L_0$  and subsequent relaxation. Three such eccentric contractions were pursued  
529 followed by a final assessment of maximum isometric force. (B), *Actn3KO* fibres showed  
530 much lower survival and higher rate of breakage during the sequence to a significance of  
531  $p=0.02$  based on logrank analysis.

532

533 **Figure 7: SHG imaging and quantitative morphometry in single dissociated EDL fibres**  
534 **reveal misregistered myofibrillar ultrastructure in *Actn3KO*.** (A), Representative example  
535 images from the middle plane of a single WT and *Actn3KO* EDL fibre (top) of the same 13-  
536 15 month age group alongside with the automatically detected verniers (red) and the vernier

537 density (VD) and cosine angle sum (CAS) values derived from the morphometry analysis. A  
538 magnified rectangular section is given below the images. **(B)**, Group analysis in a substantial  
539 number of single fibres from several animals reveals significantly higher VD values in  
540 *Actn3KO* fibres over fibres from WT littermates, indicative of a higher linear *out-of-register*  
541 disorder. As for the angular variability of myofibrils, the CAS values were similar in both  
542 groups. \*\*:  $p < 0.001$ , Mann-Whitney Rank sum test. (n/m): n single fibres from m animals.

543

#### 544 **Additional files**

545 **Additional file 1: Supplementary figure A.** Frequency distribution of FDB fibre widths. A  
546 total of 200 WT FDB fibres were measured.

547 **Additional file 2: Supplementary figure B.** High-speed camera view of a single unloaded  
548 FDB fibre contracting at 20 Hz.

549

#### 550 **List of abbreviations**

|     |           |                           |
|-----|-----------|---------------------------|
| 551 | CAS       | Cosine angle sum          |
| 552 | CSA       | Cross sectional area      |
| 553 | dL        | Distance shortened        |
| 554 | dT        | Time shortened            |
| 555 | EDL       | Extensor digitorum longus |
| 556 | $F_{abs}$ | Maximum absolute force    |
| 557 | $F_R$     | Restoration force         |

|     |                       |                                               |
|-----|-----------------------|-----------------------------------------------|
| 558 | $F_{\text{relax}}$    | Force at steady state                         |
| 559 | $F_{\text{sig}}$      | End of fast phase                             |
| 560 | FDB                   | Flexor digitorum brevis                       |
| 561 | $K_{\text{apparent}}$ | Apparent dissociation constant                |
| 562 | KO                    | Knock out                                     |
| 563 | $L_0$                 | Optimal length                                |
| 564 | MyHC                  | Myosin heavy chain                            |
| 565 | pCa                   | Calcium concentration                         |
| 566 | pCa <sub>50</sub>     | Calcium concentration at 50% of maximum force |
| 567 | SHG                   | Second harmonic generation                    |
| 568 | $\tau_{\text{relax}}$ | Time to reach steady state                    |
| 569 | VD                    | Vernier density                               |
| 570 | $V_{\text{fast}}$     | Fast velocity                                 |
| 571 | WT                    | Wild type                                     |

572

573 **Declarations**

574 **Ethics approval and consent to participate**

575 Use of animals was approved by the Animal Care and Ethics Committees of the Children's  
576 Medical Research Institute and the University of New South Wales.

577 **Consent for publication**

578 Not applicable, no data was obtained from individual person

579 **Availability of data and materials**

580 The datasets used and/or analysed during the current study are available from the  
581 corresponding author on reasonable request.

582 **Competing interests**

583 Authors have read the journal's editorial policy on disclosure of potential conflict of interest.  
584 The authors declare that they have no competing interests.

585 **Funding**

586 This project was funded in part by grants from the National Health and Medical Research  
587 Council of Australia. The funders had no role in study design, data collection and analysis,  
588 decision to publish, or preparation of the manuscript.

589 **Author's contributions**

590 MH, BR, SN, LK, DAGM, PJH, KNN, OF and SIH Conceived of and designed research;

591 MH, BR, SN, LK, DAGM, OF and SIH Performed the research;

592 MH, BR, SN, LK and DAGM Analysed the research;

593 SIH Interpreted results of experiments and drafted the manuscript;

594 MH and OF Prepared figures;

595 MH, BR, LK, DAGM, PJH, KNN, OF and SIH Edited and revised the manuscript.

596 All authors approved the final version of manuscript and agree to be accountable for all  
597 aspects of the work in ensuring that questions related to the accuracy or integrity of any part

598 of the work are appropriately investigated and resolved. All persons designated as authors  
599 quality for authorship, and all those who qualify for authorship are listed.

600

601 **References**

602 1. Berman Y, North KN. A gene for speed: the emerging role of alpha-actinin-3 in  
603 muscle metabolism. *Physiology (Bethesda)*. 2010;25(4):250-9.

604

605 2. North KN, Yang N, Wattanasirichaigoon D, Mills M, Eastal S, Beggs AH. A  
606 common nonsense mutation results in alpha-actinin-3 deficiency in the general population.  
607 *Nat Genet*. 1999;21(4):353-4.

608

609 3. Head SI, Chan S, Houweling PJ, Quinlan KG, Murphy R, Wagner S, et al. Altered  
610 Ca<sup>2+</sup> kinetics associated with  $\alpha$ -Actinin-3 deficiency may explain positive selection for  
611 ACTN3 null allele in human evolution. *PLoS Genet*. 2015;11(1):e1004862.

612

613 4. Wyckelsma VL, Venckunas T, Houweling PJ, Schlittler M, Lauschke VM, Tiong CF,  
614 et al. Loss of alpha-actinin-3 during human evolution provides superior cold resilience and  
615 muscle heat generation. *Am J Hum Genet*. 2021;108(3):446-57.

616

617 5. Knoll R. Z-line proteins: implications for additional functions. *Eur Heart J Suppl*.  
618 2002;4:I13-I7.

619



- 620 6. Yang N, MacArthur DG, Gulbin JP, Hahn AG, Beggs AH, Easteal S, et al. ACTN3  
621 genotype is associated with human elite athletic performance. *Am J Hum Genet.*  
622 2003;73(3):627-31.
- 623
- 624 7. Lee FXZ, Houweling PJ, North KN, Quinlan KGR. How does  $\alpha$ -actinin-3 deficiency  
625 alter muscle function? Mechanistic insights into ACTN3 , the ‘gene for speed’. *Biochim*  
626 *Biophys Acta.* 2016;1863(4):686-93.
- 627
- 628 8. Friedrich O, Weber C, von Wegner F, Chamberlain JS, Fink RH. Unloaded speed of  
629 shortening in voltage-clamped intact skeletal muscle fibers from wt, mdx, and transgenic  
630 minidystrophin mice using a novel high-speed acquisition system. *Biophys J.*  
631 2008;94(12):4751-65.
- 632
- 633 9. Seto JT, Chan S, Turner N, MacArthur DG, Raftery JM, Berman YD, et al. The effect  
634 of  $\alpha$ -actinin-3 deficiency on muscle aging. *Exp Gerontol.* 2011;46(4):292-302.
- 635
- 636 10. Chan S, Seto JT, Houweling PJ, Yang N, North KN, Head SI. Properties of extensor  
637 digitorum longus muscle and skinned fibers from adult and aged male and female Actn3  
638 knockout mice. *Muscle Nerve.* 2011;43(1):37-48.
- 639
- 640 11. Schiaffino S, Reggiani C. Fiber types in mammalian skeletal muscles. *Physiol Rev.*  
641 2011;91(4):1447-531.
- 642

- 643 12. Barbara V, Katrien De B, Monique R, Els Van den E, Marc Van L, Peter H, et al.  
644 ACTN3 (R577X) genotype is associated with fiber type distribution. *Physiol Genomics*.  
645 2007;32(1):58-63.  
646
- 647 13. Lowe DA, Warren GL, Hayes DA, Farmer MA, Armstrong R. Eccentric contraction-  
648 induced injury of mouse soleus muscle: effect of varying [Ca<sup>2+</sup>] o. *J Appl Physiol*.  
649 1994;76(4):1445-53.  
650
- 651 14. Warren GL, Hayes DA, Lowe DA, Armstrong RB. Mechanical factors in the  
652 initiation of eccentric contraction-induced injury in rat soleus muscle. *J Physiol*.  
653 1993;464:457-75.  
654
- 655 15. Chan S, Seto JT, MacArthur DG, Yang N, North KN, Head SI. A gene for speed:  
656 contractile properties of isolated whole EDL muscle from an alpha-actinin-3 knockout  
657 mouse. *Am J Physiol Cell Physiol*. 2008;295(4):C897-904.  
658
- 659 16. Seto JT, Lek M, Quinlan KG, Houweling PJ, Zheng XF, Garton F, et al. Deficiency of  
660  $\alpha$ -actinin-3 is associated with increased susceptibility to contraction-induced damage and  
661 skeletal muscle remodeling. *Hum Mol Genet*. 2011;20(15):2914-27.  
662
- 663 17. MacArthur DG, Seto JT, Chan S, Quinlan KG, Raftery JM, Turner N, et al. An Actn3  
664 knockout mouse provides mechanistic insights into the association between  $\alpha$ -actinin-3  
665 deficiency and human athletic performance. *Hum Mol Genet*. 2008;17(8):1076-86.  
666

- 667 18. Hsu C, Moghadaszadeh, B, Hartwig, J H, Beggs, A H. Sarcomeric and non-muscle  $\alpha$ -  
668 actinin isoforms exhibit differential dynamics at skeletal muscle Z-lines. Cytoskeleton  
669 (Hoboken). 2018;75:213-28.  
670
- 671 19. Haug M, Reischl B, Prolss G, Pollmann C, Buckert T, Keidel C, et al. The  
672 MyoRobot: A novel automated biomechanics system to assess voltage/Ca(2+) biosensors  
673 and active/passive biomechanics in muscle and biomaterials. Biosens Bioelectron.  
674 2018;102:589-99.  
675
- 676 20. Endo M. Calcium Release from Sarcoplasmic Reticulum. In: Bronner F, editor.  
677 Current Topics in Membranes and Transport. 25: Academic Press; 1985. p. 181-230.  
678
- 679 21. Friedrich O, Both M, Weber C, Schurmann S, Teichmann MDH, von Wegner F, et al.  
680 Microarchitecture is severely compromised but motor protein function is preserved in  
681 dystrophic *mdx* skeletal muscle. Biophys J. 2010;98(4):606-16.  
682
- 683 22. Bekoff A, Betz WJ. Physiological properties of dissociated muscle fibres obtained  
684 from innervated and denervated adult rat muscle. J Physiol. 1977;271(1):25-40.  
685
- 686 23. Head SI, Stephenson DG, Williams DA. Properties of enzymatically isolated skeletal  
687 fibres from mice with muscular dystrophy. J Physiol. 1990;422:351-67.  
688
- 689 24. Selvin D, Hesse E, Renaud JM. Properties of single FDB fibers following a  
690 collagenase digestion for studying contractility, fatigue, and pCa-sarcomere shortening  
691 relationship. Am J Physiol Regul Integr Comp Physiol. 2015;308(6):R467-79.

692

693 25. Yusuke Komiya | SSDMRIMNRTYIWM. Mouse soleus (slow) muscle shows greater  
694 intramyocellular lipid droplet accumulation than EDL (fast) muscle: fiber type-specific  
695 analysis. *J Muscle Res Cell Motil.* 2017;38:163–73.

696

697 26. Hettige P, Tahir U, Nishikawa KC, Gage MJ. Comparative analysis of the  
698 transcriptomes of EDL, psoas, and soleus muscles from mice. *BMC Genomics.*  
699 2020;21(1):808.

700

701 27. Williams DA, Head SI, Lynch GS, Stephenson D. Contractile properties of skinned  
702 muscle fibres from young and adult normal and dystrophic (mdx) mice. *J Physiol.*  
703 1993;460(1):51-67.

704

705 28. Patel TJ, Lieber RL. Force transmission in skeletal muscle: from actomyosin to  
706 external tendons. *Exerc Sport Sci Rev.* 1997;25:321-63.

707

708 29. Nielsen J, Farup J, Rahbek SK, de Paoli FV, Vissing K. Enhanced Glycogen Storage  
709 of a Subcellular Hot Spot in Human Skeletal Muscle during Early Recovery from Eccentric  
710 Contractions. *PLoS One.* 2015;10(5):e0127808.

711

712 30. Pyle WG, Solaro RJ. At the Crossroads of Myocardial Signaling: The Role of Z-Discs  
713 in Intracellular Signaling and Cardiac Function. *Circ Res.* 2004;94(3):296-305.

714

- 715 31. Broos S, Malisoux L, Theisen D, van Thienen R, Ramaekers M, Jamart C, et al.  
716 Evidence for ACTN3 as a Speed Gene in Isolated Human Muscle Fibers. PloS one.  
717 2016;11(3):e0150594-e.  
718
- 719 32. Buttgerit A, Weber C, Garbe CS, Friedrich O. From chaos to split-ups - SHG  
720 microscopy reveals a specific remodelling mechanism in ageing dystrophic muscle. J Pathol.  
721 2013;229(3):477-85.  
722
- 723 33. Iyer SR, Shah SB, Valencia AP, Schneider MF, Hernández-Ochoa EO, Stains JP, et  
724 al. Altered nuclear dynamics in MDX myofibers. J Appl Physiol. 2017;122(3):470.  
725
- 726 34. Judson RN, Wackerhage H, Hughes A, Mavroiedi A, Barr RJ, Macdonald HM, et al.  
727 The functional ACTN3 577X variant increases the risk of falling in older females: results  
728 from two large independent cohort studies. J Gerontol A Biol Sci Med Sci. 2011;66(1):130-5.  
729  
730
